# Supplementary material for: A putative pH-dependent nuclear localization signal in the juxtamembrane region of c-Met
Source: PubMed Central journal article supplement — Exp Mol Med. 2014 Oct 24;46(10):e119–. doi: 10.1038/emm.2014.67 (PMC4221695; doi:10.1038/emm.2014.67), 2014-10-24
Supplement: emm201467x1.pdf [file emm201467x1.pdf]

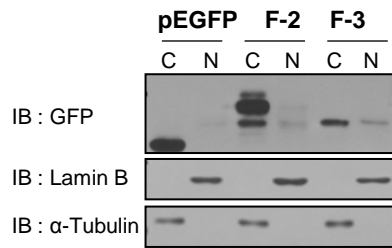

**Supplementary Figure 1. Subcellular localization of truncated form of Met fusion constructs.** Cellular fractionation of HeLa cells transiently transfected with fusion constructs (GFP-F2 or GFP-F3) was carried out. C, cytoplasmic fraction; N, nuclear fraction. Both fusion proteins (GFP-F2 and GFP-F3) showed dual (cytoplasmic and nuclear) localization in immunoblotting analysis with anti-GFP antibody. Purity of cellular fractionation was checked by lamin B (nuclear marker) and tubulin (cytoplasmic marker) respectively. Each experiment was performed in triplicates with equivalent results.
