# Supplementary material for: A putative pH-dependent nuclear localization signal in the juxtamembrane region of c-Met
Source: PubMed Central journal article supplement — Exp Mol Med. 2014 Oct 24;46(10):e119–. doi: 10.1038/emm.2014.67 (PMC4221695; doi:10.1038/emm.2014.67), 2014-10-24
Supplement: emm201467x3.pdf [file emm201467x3.pdf]

**Supplementary Table 1.** Amino acid alignment of known bipartite nuclear localization signals

| <b>Protein Name (Source)</b> | <b>A possible consensus of bipartite NLSs</b>                                                                                                                                                                 | <b>Spacer length</b> |
|------------------------------|---------------------------------------------------------------------------------------------------------------------------------------------------------------------------------------------------------------|----------------------|
|                              | <p>K R – X<sub>(10-12)</sub> – K (K/R) (K/R)</p> <p>or</p> <p>K R – X<sub>(10-12)</sub> – K (K/R) – X – (K/R)</p> <p>(K/R) (K/R) – X<sub>(10-12)</sub> – (K/R)</p> <p>K R – X<sub>(10-12)</sub> – K R R K</p> |                      |
| Npl                          | <b>K R P A A T K K A G Q A K K K K L D</b>                                                                                                                                                                    | 10                   |
| NIN2                         | <b>R K K R K T E E E S P L K D K A K K S K</b>                                                                                                                                                                | 13                   |
| SWI5                         | <b>K K Y E N V V I K R S P R K R G R P R K</b>                                                                                                                                                                | 11                   |
| Rb                           | <b>K R S A E G S N P P K P L K K L R</b>                                                                                                                                                                      | 12                   |
| PB2                          | <b>K R K R D S S I L T D S Q T A T K R I R M A</b>                                                                                                                                                            | 13                   |
| CBP80                        | <b>S R R R H S D E N D G G O P H K R R K T S</b>                                                                                                                                                              | 13                   |
| c-Met                        | <b>Q H V V I G P S S L I V H</b>                                                                                                                                                                              | 10                   |

Npl, nucleoplasmin; NIN2, Xenopus phosphoprotein NIN2; SWI5, Saccharomyces cerevisiae protein SWI5; Rb, retinoblastoma protein; Pb2, influenza virus polymerase Pb2; CBP80, human cap-binding protein 80; c-Met, human receptor tyrosine kinase protein c-Met.

Ref. Molecular basis for specificity of nuclear import and prediction of nuclear localization. (Biochim Biophys Acta. 2011 Sep; 1813 (9):1562-77.)
