# Supplementary material for: A putative pH-dependent nuclear localization signal in the juxtamembrane region of c-Met
Source: PubMed Central journal article supplement — Exp Mol Med. 2014 Oct 24;46(10):e119–. doi: 10.1038/emm.2014.67 (PMC4221695; doi:10.1038/emm.2014.67), 2014-10-24
Supplement: emm201467x4.pdf [file emm201467x4.pdf]

**Supplementary Table 2.** Lists of nucleotide sequences

(A)

| S.N | Construct Name           | Name of primers                    | Direction of primers | Primer Sequences                                                                    |
|-----|--------------------------|------------------------------------|----------------------|-------------------------------------------------------------------------------------|
| 1.  | Juxtakinase domain (JKD) | XhoI hMet + 3056<br>hMet3455-BamHI | 5'-3'<br>5'-3'       | CCGCTCGAGCGGATGAAGAGAAAGCAAATTAAGATCTGGG<br>GGCGCCGGATCCCCACAAAATGCCCTCTTCTATGACTTC |
| 2.  | Fragment No. (F-2)       | XhoIhMet+ 3101<br>hMet3265-BamHI   | 5'-3'<br>5'-3'       | AAACTCGAGGATGCAAGAGTACACACTCCT<br>AAGGATCCTAATACTGCACTTGTCGGCATGA                   |
| 3.  | Fragment No. (F-3)       | XhoIhMet+ 3266<br>HMet3439-BamHI   | 5'-3'<br>5'-3'       | AAACTCGAGCCTCTGACAGACATGTCCCCAT<br>AAGGATCCTATATGACTTCATTGAAATGCAC                  |

(B)

| S.N. | Construct name       | Name of Primers                                                        | Direction of primers | Primer sequences                                                                  |
|------|----------------------|------------------------------------------------------------------------|----------------------|-----------------------------------------------------------------------------------|
| 1.   | H1068A               | H1068A- sense                                                          | 5'- 3'               | GTCCAGGCAGTGCAGGCTGTAGTGATTGGGCC                                                  |
| 2.   | H1079A               | H1079A-sense                                                           | 5'- 3'               | GCCCAGTAGCCTGATTGTGGCTTTCAATGAAGTC                                                |
| 3.   | H1068N               | H1068N-sense                                                           | 5'- 3'               | GCCCAGTAGCCTGATTGTGGCTTTCAATGAAGTC                                                |
| 4.   | H1068K               | H1068K- sense                                                          | 5'- 3'               | GTCCAGGCAGTGCAGAAGGTAGTGATTGGGCC                                                  |
| 5.   | H1079K               | H1079K- sense                                                          | 5'- 3'               | AGTAGCCTGATTGTGAAGTTCAATGAAGTCATA                                                 |
| 6.   | $\Delta$ L1035-S1044 | Met- $\Delta$ L1035-S1044-sense<br>Met- $\Delta$ L1035-S1044-antisense | 5'- 3'<br>5'- 3'     | ACAGACATGTCCCCATCCCATTACTGCAAATACTG<br>AGTATTTTGCAGTAATGGGATGGGGACATGTCTGT        |
| 7.   | $\Delta$ S1043-H1052 | Met- $\Delta$ S1043-H1052-sense<br>Met- $\Delta$ S1043-H1052-antisense | 5'- 3'<br>5'- 3'     | CCTAACTAGTGGGACTCTGATATATTTGACCTCAGTGC<br>GCACTGAGGTCAATTATATCAGAGTCCCCACTAGTTAGG |
| 8.   | $\Delta$ I1053-L1062 | Met- $\Delta$ I1053-L1062-sense<br>Met- $\Delta$ I1053-L1062-antisense | 5'- 3'<br>5'- 3'     | GCAAATACTGTCCACGTCCAGGCAGTGCAGC<br>GCTGCACTGCCTGGACGTGGACAGTATTTTGC               |
| 9.   | $\Delta$ H1068-H1079 | Met- $\Delta$ H1068-H1079-sense<br>Met- $\Delta$ H1068-H1079-antisense | 5'- 3'<br>5'- 3'     | GGTCCAGGCAGTGCAGTTCAATGAAGTCATAGG<br>CCTATGACTTCATTGAACTGCACTGCCTGGACC            |

**(A)** Nucleotide sequences of primers used for generation of GFP-Juxta kinase domain (JKD), Fragment No.2 (F-2) and Fragment No.3 (F-3) constructs. **(B)** Nucleotide sequences of primers (sense and antisense) used for the generation of histidine substitution; and deletion mutants.
